# Supplementary material
Source: publisher figshare collection journal article supplement (https://rs.figshare.com/ndownloader/files/20467221)
Supplement: Supplementary file 1 [file 20467221]

## Sheet: Figure 1D
Shear Stress at Membrane Surface											Through-Membrane Velocity
All values in dyne / cm2											All values in mm / s
Scaffold	50rpm	100rpm	150rpm	200rpm							Scaffold	50rpm	100rpm	150rpm	200rpm
Mass-weighted average	0.000770186	0.00525025	0.0133455	0.0259625							Mass-weighted average	0.405	1.66118	2.91	4.45
Max	0.00116	0.00772	0.0203	0.0399984
Min	0.000277	0.00214	0.00566	0.0117358							Strata
											Mass-weighted average	0.0463022	0.193	0.401476	0.686
Strata
Mass-weighted average	0.000129469	0.000918276	0.00275459	0.00582							Polaris
Max	0.000182713	0.00134	0.00415	0.00891							Mass-weighted average	0.00228	0.00959	0.0199	0.0344
Min	7.38923e-05	0.00052	0.00157	0.00332
Polaris
Mass-weighted average	8.31961e-06	6.10872e-05	0.000187	0.000408
Max	1.51e-05	0.000109377	0.000335	0.000725
Min	4.64e-06	3.50795e-05	0.000112	0.000246

## Sheet: Figure 2B
MTT of perfused HepG2
	1	2	3	4	5	6	7	8	9	10	11	12
A	0.249	0.561	0.558	0.526	0.594	0.758							570
B	0.245	0.577	0.563	0.526	0.588	0.761							570
C	0.245	0.577	0.567	0.528	0.605	0.767							570
D	0.036	0.036	0.036										570
E													570
F	1.153	1.204	1.058	1.032	0.99	0.989							570
G	1.271	1.202	1.072	1.02	0.956	0.989							570
H	1.266	1.224	1.074	1.051	0.956	0.991							570
	Blank
	0.036
								Average	Std Error
	Static	0.210333	0.535667	0.526667	0.490667	0.559667	0.726	0.508167	0.068365
	Perfused	1.194	1.174	1.032	0.998333	0.931333	0.953667	1.04722	0.0456147

## Sheet: Bradford Assay
	1	2	3	4	5	6	7	8	9	10	11	12
A	1.062	1.208	1.174	1.229	1.234	1.264							600
B	1.104	1.29	1.176	1.312	1.285	1.307							600
C	1.152	1.266	1.108	1.335	1.302	1.284							600
D	0.464	0.553	0.792	0.866	1.133	1.206	1.315						600
E													600
F													600
G													600
H													600
	Static 1	Static 2	Static 3		Perfused 1	Perfused 2	Perfused 3
Avg Reading	1.106	1.25467	1.15267		1.292	1.27367	1.285
mg protein	1.09362	1.54848	1.20789		1.77736	1.64615	1.72		Calculated from extrapolation of 2nd order polynomial fit of standards using Prism
	Standards
	0.125	0.25	0.5	0.75	1	1.5	2
	0.464	0.553	0.792	0.866	1.133	1.206	1.315

## Sheet: Figure 2C
	Urea Assay
		1	2	3	4	5	6	7	8	9	10	11	12
	A	1.15	1.136	1.097			1.136	1.141	1.165					430
	B	1.121	1.188	1.17			1.216	1.26	1.198					430
	C	1.177	1.192	1.202			1.246	1.245	1.288					430
	D	1.201	1.23	1.232			1.303	1.326	1.345					430				Protein
	E													430				Static 1	Static 2	Static 3		Perfused 1	Perfused 2	Perfused 3
	F	2.834	2.791											430				1.09362	1.54848	1.20789		1.77736	1.64615	1.72
	G	1.136	1.131											430
	H													430
	Blank	1.1335
	5mg/dl	1.679
		Static 1	Static 2	Static 3	Avg	Error		Perfused 1	Perfused 2	Perfused 3	Avg	Error
	1d	0.0165	0.0025	-0.0365				0.0025	0.0075	0.0315
	mg Urea	0.0491364	0.00744491	-0.108696				0.00744491	0.0223347	0.0938058
	per mg protein	0.049423	0.00528868	-0.098987	-0.0147584	0.0439992		0.00460762	0.0149246	0.0599921	0.0265081	0.0170048
	3d	-0.0125	0.0545	0.0365				0.0825	0.1265	0.0645
	Norm	-0.0372245	0.162299	0.108696				0.245682	0.376712	0.192079
	per mg	-0.0374417	0.115293	0.098987	0.0589462	0.0484232		0.152051	0.251729	0.122841	0.17554	0.0390164
	5d	0.0435	0.0585	0.0685				0.1125	0.1115	0.1545
	norm	0.129541	0.174211	0.20399				0.335021	0.332043	0.460095
	per mg	0.130297	0.123755	0.18577	0.146607	0.0196722		0.207343	0.22188	0.294247	0.241156	0.0268748
	7d	0.0675	0.0965	0.0985				0.1695	0.1925	0.2115
	norm	0.201013	0.287373	0.293329				0.504765	0.573258	0.629839
	per mg	0.202185	0.204143	0.267129	0.224486	0.0213293		0.312397	0.383066	0.402804	0.366089	0.0274441

## Sheet: Figure 2D
		1	2	3	4	5	6	7	8	9	10	11	12
	A	0.071	0.082	0.065	0.644									450
	B	0.136	0.177	0.121	0.5									450
	C	0.193	0.234	0.184	0.413									450
	D	0.218	0.339	0.297	0.279									450				Protein
	E	0.086	0.089	0.073	0.188									450				Static 1	Static 2	Static 3		Perfused 1	Perfused 2	Perfused 3
	F	0.194	0.193	0.187	0.131									450				1.09362	1.54848	1.20789		1.77736	1.64615	1.72
	G	0.271	0.298	0.288	0.08									450
	H	0.38	0.381	0.415	0.042									450		Standard	200	0.644
																	100	0.5
																	50	0.413
																	25	0.279
																	12.5	0.188
																	6.25	0.131
		Static 1	Static 2	Static 3	Avg	Error		Perfused 1	Perfused 2	Perfused 3	Avg	Error					3.125	0.08
	1d	0.071	0.082	0.065				0.086	0.089	0.073							0	0.042
From prism	mg Albumin	1.99522	2.91522	1.50091				3.25432	3.51028	2.16115
cubic fit	per mg protein	1.82442	1.88263	1.24259	1.64988	0.204336		1.83098	2.13242	1.25648	1.73996	0.256923
	3d	0.136	0.177	0.121				0.194	0.193	0.187
	mg Albumin	7.71971	11.7484	6.33325				13.5361	13.4289	12.7908
	per mg	7.05886	7.58705	5.24324	6.62972	0.709807		7.61587	8.15773	7.43652	7.73671	0.216784
	5d	0.193	0.234	0.184				0.271	0.298	0.288
	mg Albumin	13.4289	18.0732	12.4754				22.7833	26.6272	25.157
	per mg	12.2793	11.6716	10.3283	11.4264	0.57639		12.8186	16.1754	14.6262	14.5401	0.969991
	7d	0.218	0.339	0.297				0.38	0.381	0.415
	mg Albumin	16.1976	33.3732	17.0075				41.7925	42.0279	51.3396
	per mg	14.811	21.5523	14.0804	16.8146	2.37823		23.5138	25.531	29.8486	26.2978	1.86846

## Sheet: Figure 4E
		1	2	3	4	5	6	7	8	9	10	11	12
	A	0.229	0.122	0.134		0.223	0.183	0.209		0.085	0.141	0.192		570
	B	0.186	0.132	0.149		0.219	0.182	0.214		0.082	0.142	0.195		570
	C	0.265	0.132	0.1		0.221	0.178	0.206		0.081	0.139	0.196		570
	D	1.654	1.719	1.741	1.052	1.058	1.028	1.197	1.25	1.264				570
	E													570
	F	0.485	0.635	0.605		0.493	0.485	0.635		0.402	0.476	0.371		570
	G	0.491	0.634	0.589		0.502	0.491	0.634		0.403	0.486	0.384		570
	H	0.489	0.613	0.638		0.492	0.489	0.613		0.415	0.468	0.358		570
	Fresh	1.32922
	Static	Day 1		Day 2		Day 3
		0.161	0.0315317	0.203889	0.0104181	0.08038	0.0279401
	Perfused	Day 1		Day 2		Day 3
		0.575444	0.0388052	0.537111	0.0393165	0.418111	0.0273426
